# Supplementary material for: Motivation and Barriers to Research among Nursing Professionals in Southeast Spain
Source: MDPI journal article supplement (doi:10.3390/healthcare10040675), 2022-04-02
Supplement: s1 [file s1]

Table S1: Domains and questions included in the validated questionnaire (English translated)

| Item | <b><u>Domain 1: Organisation of personal and professional life: time management</u></b>        | <b>TD</b> | <b>ED</b> | <b>NA</b> | <b>DA</b> | <b>TA</b> |
|------|------------------------------------------------------------------------------------------------|-----------|-----------|-----------|-----------|-----------|
| 1    | Research requires a lot of time and effort outside working hours.                              | 1         | 2         | 3         | 4         | 5         |
| 2    | My personal life will be negatively affected if I do research work.                            | 1         | 2         | 3         | 4         | 5         |
| 3    | Personal obligations outside working hours are an obstacle to carrying out research work.      | 1         | 2         | 3         | 4         | 5         |
| 4    | I do not have time during working hours to devote to a research project.                       | 1         | 2         | 3         | 4         | 5         |
| 5    | Carrying out research work during working hours would hinder the performance of my duties.     | 1         | 2         | 3         | 4         | 5         |
| 6    | The distribution of the working day into shifts makes it difficult to devote time to research. | 1         | 2         | 3         | 4         | 5         |
| 7    | In my job, the burden of care is one reason why it is difficult to devote time to research.    | 1         | 2         | 3         | 4         | 5         |
| 8    | Part of the working time should be spent on research projects.                                 | 1         | 2         | 3         | 4         | 5         |
| Item | <b><u>Domain 2: Knowledge and preparedness</u></b>                                             | <b>TD</b> | <b>ED</b> | <b>NA</b> | <b>DA</b> | <b>TA</b> |
| 9    | I have sufficient knowledge to carry out a research project.                                   | 1         | 2         | 3         | 4         | 5         |
| 10   | The nursing professional should read scientific journals regularly, at least once a month.     | 1         | 2         | 3         | 4         | 5         |
| 11   | There is not enough training for nursing research.                                             | 1         | 2         | 3         | 4         | 5         |
| 12   | The nursing professional must take postgraduate training courses on research.                  | 1         | 2         | 3         | 4         | 5         |

|             |                                                                                                                                                     |           |           |           |           |           |
|-------------|-----------------------------------------------------------------------------------------------------------------------------------------------------|-----------|-----------|-----------|-----------|-----------|
| 13          | Nursing curricula should include research training.                                                                                                 | 1         | 2         | 3         | 4         | 5         |
| 14          | Knowledge of new technologies (internet, databases, etc.) facilitates research.                                                                     | 1         | 2         | 3         | 4         | 5         |
| 15          | Knowledge of other languages facilitates research.                                                                                                  | 1         | 2         | 3         | 4         | 5         |
| 16          | Nursing is equally qualified as other health professionals to carry out research studies.                                                           | 1         | 2         | 3         | 4         | 5         |
| <b>Item</b> | <b><u>Domain 3: Available resources and support</u></b>                                                                                             | <b>TD</b> | <b>ED</b> | <b>NA</b> | <b>DA</b> | <b>TA</b> |
| 17          | I receive support and motivation from the nursing management to do research.                                                                        | 1         | 2         | 3         | 4         | 5         |
| 18          | Nursing research receives the same external support (grants, prizes, subsidies, publications, etc.) as that received by other health professionals. | 1         | 2         | 3         | 4         | 5         |
| 19          | At my workplace, I have access to sources of information for research.                                                                              | 1         | 2         | 3         | 4         | 5         |
| 20          | Research requires financial resources that are difficult to obtain.                                                                                 | 1         | 2         | 3         | 4         | 5         |
| 21          | At my workplace, the rest of the multidisciplinary team would collaborate in a research project in nursing.                                         | 1         | 2         | 3         | 4         | 5         |
| 22          | At my workplace, I have access to material resources (paper, computer, software, etc.) to carry out research.                                       | 1         | 2         | 3         | 4         | 5         |
| 23          | At my workplace, I have access to scientific nursing literature.                                                                                    | 1         | 2         | 3         | 4         | 5         |
| 24          | Nurses have the same economic support as other professionals for research.                                                                          | 1         | 2         | 3         | 4         | 5         |
| <b>Item</b> | <b><u>Domain 4: Professional development</u></b>                                                                                                    | <b>TD</b> | <b>ED</b> | <b>NA</b> | <b>DA</b> | <b>TA</b> |

|             |                                                                                    |           |           |           |           |           |
|-------------|------------------------------------------------------------------------------------|-----------|-----------|-----------|-----------|-----------|
| 25          | Research is a function of my professional activity.                                | 1         | 2         | 3         | 4         | 5         |
| 26          | As a nurse, I have the authority to make decisions about patient care.             | 1         | 2         | 3         | 4         | 5         |
| 27          | Nursing functions are primarily practical and do not need to include research.     | 1         | 2         | 3         | 4         | 5         |
| 28          | I would be willing to collaborate with other professionals in their research work. | 1         | 2         | 3         | 4         | 5         |
| 29          | Research brings benefits to professional nursing practice.                         | 1         | 2         | 3         | 4         | 5         |
| 30          | I do not need research to improve my work.                                         | 1         | 2         | 3         | 4         | 5         |
| 31          | Research is a function delegated to me by other professionals.                     | 1         | 2         | 3         | 4         | 5         |
| 32          | In nursing, it is difficult to find interesting fields in which to do research.    | 1         | 2         | 3         | 4         | 5         |
| 33          | Research improves the recognition of the nursing profession.                       | 1         | 2         | 3         | 4         | 5         |
| 34          | Nursing is not a research-oriented profession.                                     | 1         | 2         | 3         | 4         | 5         |
| <b>Item</b> | <b><u>Domain 5: Motivations</u></b>                                                | <b>TD</b> | <b>ED</b> | <b>NA</b> | <b>DA</b> | <b>TA</b> |
| 35          | I would like to participate in a research project.                                 | 1         | 2         | 3         | 4         | 5         |
| 36          | Being motivated in my work encourages me to do research.                           | 1         | 2         | 3         | 4         | 5         |
| 37          | I feel capable of leading a research project.                                      | 1         | 2         | 3         | 4         | 5         |
| 38          | Achieving a higher degree in my professional career is an incentive to research.   | 1         | 2         | 3         | 4         | 5         |
| 39          | A financial reward would increase research interest.                               | 1         | 2         | 3         | 4         | 5         |
| 40          | Publishing a research paper is not professionally recognized.                      | 1         | 2         | 3         | 4         | 5         |

|    |                                                                   |   |   |   |   |   |
|----|-------------------------------------------------------------------|---|---|---|---|---|
| 41 | It is not worth researching to increase the score on my CV.       | 1 | 2 | 3 | 4 | 5 |
| 42 | I am interested in the research work carried out at my workplace. | 1 | 2 | 3 | 4 | 5 |

*TD: strongly disagree; ED: disagree; NA: disagree not at all; DA: agree; TA: strongly agree.*
