# Supplementary material for: Motivation and Barriers to Research among Nursing Professionals in Southeast Spain
Source: Healthcare (Basel). 2022 Apr 2;10(4):675. doi: 10.3390/healthcare10040675 (PMC9029644; doi:10.3390/healthcare10040675)
Supplement: Supplementary file 1 [file healthcare-10-00675-s001.zip › TableS2.xlsx]

## Sheet: Hoja1
Table S2: Answer to ítems of validated questionnaire
		N	mínimum	maximum	mean	standar desviation	Answer (%)
							TD	ED	NA	DA	TA
Item 1	Domain 1	91	1	5	4.48352	0.779781	2.2	0	4.4	34.1	59.3
Item 2		91	1	5	3.18681	1.2729	12.1	18.7	25.3	26.4	17.6
Item 3		91	2	5	3.84615	0.930031	0	8.8	25.3	38.5	27.5
Item 4		91	1	5	4.32967	1.01165	2.2	4.4	13.2	18.7	61.5
Item 5		91	1	5	3.85714	1.11127	3.3	9.9	19.8	31.9	35.2
Item 6		91	1	5	3.06593	1.19073	12.1	18.7	31.9	25.3	12.1
Item 7		91	1	5	4.15385	0.918006	1.1	4.4	15.4	36.3	42.9
Item 8		91	1	5	3.98901	0.936833	1.1	6.6	17.6	41.8	33
Item 9	Domain 2	91	1	5	3.02198	1.20165	11	23.1	33	18.7	14.3
Item 10		91	1	5	4.04396	1.02102	2.2	6.6	16.5	34.1	40.7
Item 11		91	1	5	3.81319	1.26414	7.7	9.9	14.3	29.7	38.5
Item 12		91	1	5	3.97802	0.977275	1.1	6.6	22	34.1	36.3
Item 13		91	1	5	4.50549	0.807928	1.1	2.2	6.6	25.3	35.2
Item 14		91	4	5	4.91209	0.284736	0	0	0	8	83
Item 15		91	2	5	4.82418	0.507574	1.1	0	2.2	9.9	86.8
Item 16		91	2	5	4.69231	0.710122	0	2.2	7.7	8.8	81.3
Item 17	Domain 3	91	1	5	2.40659	1.19236	30.8	22	26.4	17.6	3.3
Item 18		91	1	5	2.13187	1.06676	36.3	26.4	27.5	7.7	2.2
Item 19		91	1	5	2.7033	1.1105	16.5	24.2	38.5	14.3	6.6
Item 20		91	1	5	3.59341	1.11533	4.4	12.1	27.5	31.9	24.2
Item 21		91	1	5	3.2967	0.936833	3.3	14.3	40.7	33	8.8
Item 22		91	1	5	3.31868	1.14386	6.6	18.7	26.4	33	15.4
Item 23		91	1	5	2.84615	1.10477	14.3	19.8	39.6	19.8	6.6
Item 24		91	1	5	2.30769	0.962546	22	35.2	36.3	3.3	3.3
Item 25	Domain 4	91	1	5	3.81319	1.24644	5.5	15.4	8.8	33	37.4
Item 26		91	2	5	4.45055	0.637072	0	1.1	4.4	42.9	51.6
Item 27		91	1	5	1.73626	1.08357	57.1	25.3	8.8	4.4	4.4
Item 28		91	2	5	4.46154	0.860332	0	5.5	7.7	22	64.8
Item 29		91	3	5	4.78022	0.466719	0	0	2.2	17.6	80.2
Item 30		91	1	5	1.72527	1.13594	59.3	24.2	7.7	2.2	6.6
Item 31		91	1	4	1.58242	0.870069	64.8	14.3	18.7	2.2	0
Item 32		91	1	5	1.74725	1.1604	60.4	20.9	7.7	5.5	5.5
Item 33		91	1	5	4.63736	0.78197	1.1	2.2	5.5	14.3	76.9
Item 34		91	1	5	1.69231	1.05084	58.2	26.4	7.7	3.3	4.4
Item 35	Domain 5	91	1	5	4	1.0435	2.2	6.6	20.9	29.7	40.7
Item 36		91	1	5	4.18681	1.07406	3.3	5.5	13.2	25.3	52.7
Item 37		91	1	5	3.04396	1.31582	11	29.7	24.2	14.3	20.9
Item 38		91	1	5	3.8022	1.16638	3.3	14.3	16.5	30.8	35.2
Item 39		91	1	5	4.0989	1.12601	4.4	4.4	18.7	22	50.5
Item 40		91	1	5	3.16484	1.31033	15.4	12.1	33	19.8	19.8
Item 41		91	1	5	2.43956	1.24908	26.4	31.9	23.1	8.8	9.9
Item 42		91	1	5	3.79121	1.08029	3.3	5.5	34.1	23.1	34.1
